# Supplementary material
Source: Springer Nature journal article supplement (https://www.springermedizin.de/resource/supplementary/12971_2013_153_MOESM1_ESM.pdf/9595086)

**a) Addiction pathology**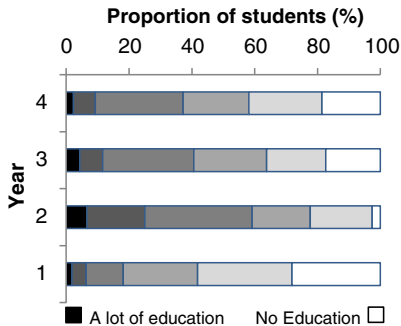**b) Disease causation epidemiology**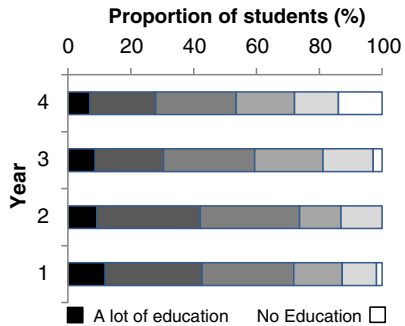**c) Pregnancy and pediatrics**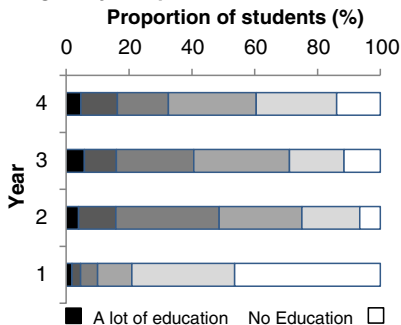**d) Pharmacotherapy**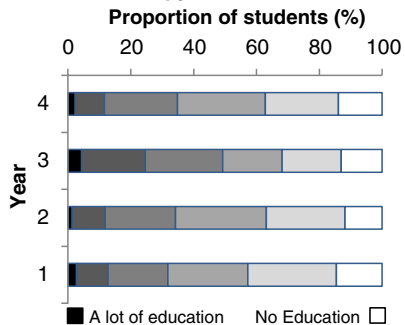**e) Counseling and motivational interviewing**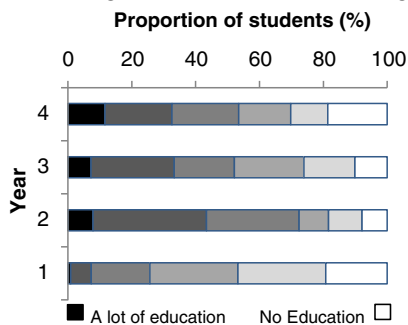**f) Public health**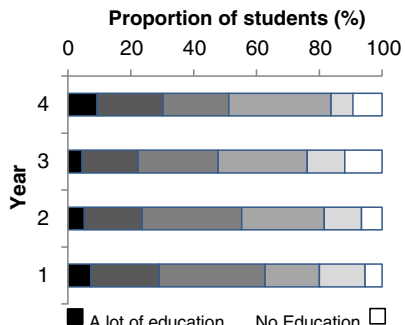

Supplement: MOESM1 [file 9595086]
